# Supplementary material
Source: publisher site journal article supplement (http://edge.sagepub.com/sites/default/files/AppendixF_0.pdf)
Supplement: Supplementary file 1 [file AppendixF_0.pdf]

## F: Florida Supplement Web Resources

The following is a list of internet resources that will be useful in further researching the topics addressed in this supplement. Included are several sources where you can find primary information on Florida's unique criminal laws.

[http://www.law.ufl.edu/lic/guides/florida/fllegislative\\_history.shtml](http://www.law.ufl.edu/lic/guides/florida/fllegislative_history.shtml)

The University of Florida Levin College of Law's online research guide to Florida legislative history gives a basic overview of the process by which a bill becomes Florida statute. The guide also provides information regarding where you can look to find out more about a piece of legislation, specifically information that is vital to understanding a statute's legislative intent. If the information referenced is available online, you will find a link to it on this page.

<http://library.law.miami.edu/flaleghistguide.html>

Published by the University of Miami Law Library, this page focuses on how to research Florida legislative history. It gives a detailed description of the legislative process, describing the importance of understanding this process to the pursuit of determining a statute's legislative intent. It also gives an in-depth and detailed list of sources for finding the necessary documentation to fully research the history of a given piece of Florida legislation.

<http://dlis.dos.state.fl.us/barm/fsa/legislativeresearch.htm>

This page is part of the website of the Florida Bureau of Archives and Records Management and is a guide to researching legislation at the Florida Archives. The Florida Archives are an important primary source of information when researching the history and intent of Florida legislation. This page also provides information about obtaining documents long-distance.

<http://palmm.fcla.edu/fh/outline/outline.html>

This Florida history timeline comes from the Florida Heritage Collection, a cooperative effort of the Florida State University System. The page shows a timeline of periods of Florida history. The years spanned are noted throughout the timeline and links are provided to other pages where you can read the history of each period. When researching legislation it is helpful to be able to understand the historical context of a statute. With this resource you can easily find this information by looking for the relevant year or years within the timeline.

<http://www.law.fsu.edu/crc/>

Every twenty years the Florida Constitution Revision Commission meets to review and propose changes to the state's Constitution. This is the website of the most recent Constitution Revision Commission, in 1997- 1998. Through this site you can find information about the commission's process, as well as actual transcripts and summaries of meetings and public hearings held by the commission and its various committees. Information regarding the structure of the commission and the proposals that it made are also available.

Additional General Web Resources:

<http://www.llsdc.org/state-leg/>

Links to state laws, regulation, and legislatures from the Law Librarians' Society of Washington, D.C.

[http://www.usa.gov/Agencies/State\\_and\\_Territories.shtml](http://www.usa.gov/Agencies/State_and_Territories.shtml)

Links to official state government websites.

<http://www.govspot.com/state/>

Links to various government resources for each state, such as census data, laws, departments and agencies.
